# Supplementary material
Source: PubMed Central journal article supplement (PMC3358876)
Supplement: 1116125109_pnas.201116125SI.pdf [file 1116125109_pnas.201116125SI.pdf]

# Supporting Information

Koch et al. 10.1073/pnas.1116125109

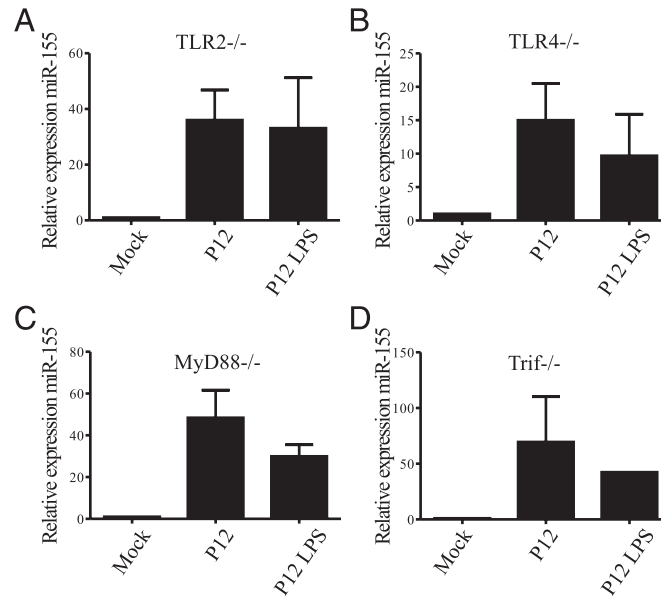

**Fig. S1.** Up-regulation of microRNA-155 (miR-155) is similar in Toll-like receptor 2 (TLR2<sup>-/-</sup>), Toll-like receptor 4 (TLR4<sup>-/-</sup>), MyD88<sup>-/-</sup>, and Trif<sup>-/-</sup> bone marrow-derived macrophages (BMMs). (A and B) *H. pylori* P12 [multiplicity of infection (MOI) of 50] and P12 LPS (1.5  $\mu$ g/mL, 2,000 endotoxin unit/mL) led to up-regulation of miR-155 in TLR2<sup>-/-</sup> (A) and TLR4<sup>-/-</sup> BMMs (B). (C and D) BMMs lacking the adaptor protein MyD88 (C) show an up-regulation of miR-155 in response to P12 and P12 LPS similar to that seen in BMMs lacking the adaptor protein Trif (D). Experiments were performed with at least two biologically independent experiments and are presented as mean + SE.

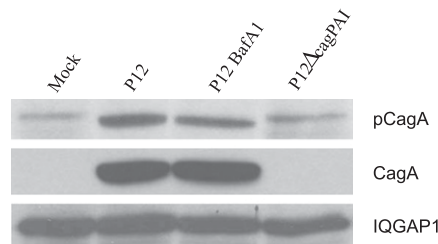

**Fig. S2.** Functional type IV secretion system in bafilomycin A1 (BafA1)-treated BMMs. A representative Western blot (of three total) shows phosphorylated CagA in P12-infected WT BMMs (3 h) as well as in P12-infected WT BMMs treated with 100 nM BafA1.

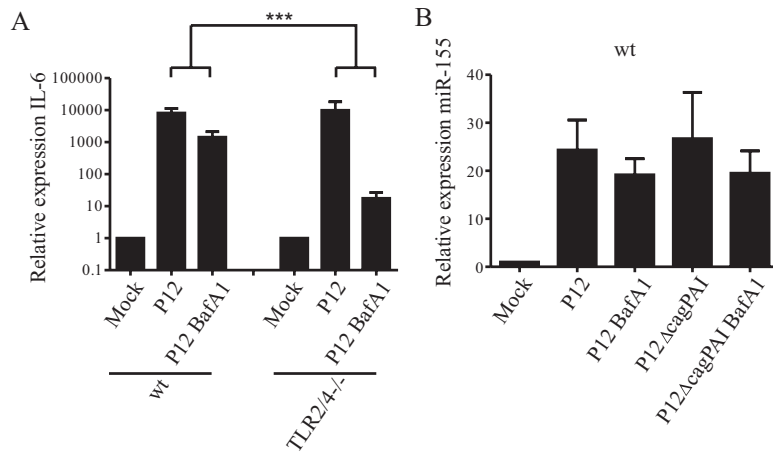

**Fig. 53.** Control experiments for the BafA1 effects. (A) BafA1 treatment (100 nM 1 h before infection) almost completely blocks IL-6 mRNA expression response to P12 infection (MOI of 50; 3 h) in TLR2/4<sup>-/-</sup> BMMs but not in WT BMMs. (B) WT BMMs were pretreated with 100 nM BafA1 or were left untreated and were infected with P12 (MOI of 50; 3 h). Experiments were performed with at least three biologically independent replicates and are presented as mean + SE. To determine the statistical significance, Student's *t* test was performed between the ratio of BafA1-treated to untreated BMMs; \*\*\**P* < 0.001.

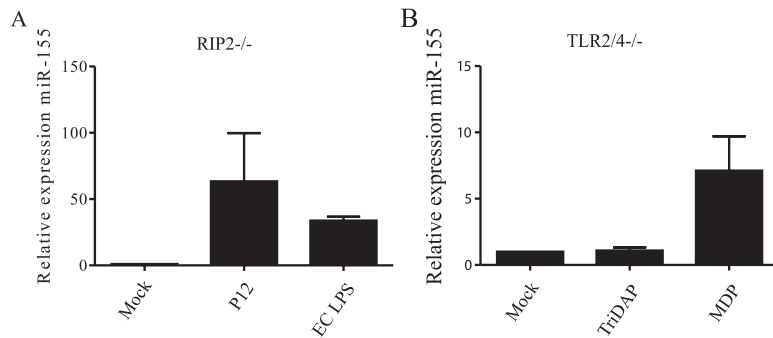

**Fig. 54.** Experiments with NOD1/2 ligands. (A) BMMs lacking the NOD adaptor molecule RIP2 were infected with *H. pylori* P12 (MOI of 50), *Escherichia coli* LPS (EC LPS, 100 ng/mL) for 3 h. (B) BMMs lacking TLR2/4 were incubated with the NOD1 ligand TriDAP (2.5 μg/mL) and the NOD2 ligand MDP (100 μg/mL) for 3 h. Experiments were performed with at least two biologically independent replicates and are presented as mean + SE.

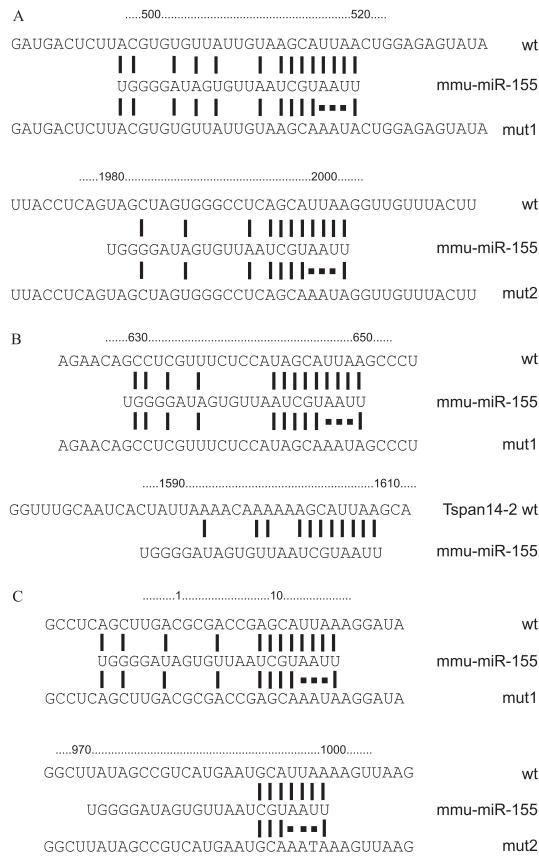

**Fig. S5.** Mutation of the miR-155 targets *Pmaip1*, *Tspan14*, and *Lpin1*. Sequences of the putative binding sites for *Mus musculus* (mmu) mmiR-155 (mouse) and their mutated versions *Pmaip1*-3' UTR (A), *Tspan14*-3' UTR (B), and *Lpin1*-3' UTR (C). All putative targets here possess two binding sites for mmiR-155. In *Lpin1* and *Pmaip1* constructs, both binding sites were mutated; the double mutation showed the stronger effect. In case of *Tspan14*, a full-length construct (*Tspan14-2*), and a truncated version (*Tspan14-1*) were used; only the truncated version was mutated.

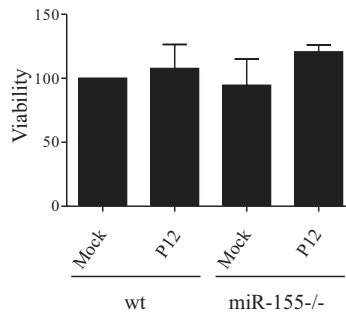

**Fig. S6.** Control of viability of BMMs before cisplatin treatment. To detect any differences in survival of the infected cells, water-soluble tetrazolium salts (WST-8) assays were performed. WT and miR-155<sup>-/-</sup> BMMs were infected with *H. pylori* P12 for 30 h (MOI of 50) or were mock infected. The results were normalized to mock-infected WT BMMs at 100%. The WST-8 assays did not reveal any significant differences among any of the cells. Data are presented as percentage (viability) and represent mean + SE of three biologically independent experiments.

**Table S1. Microarray analysis shows known and unknown targets of miR-155 during infection with *H. pylori***

| Array 1     |          | Array 2     |          | Accession no. | Primary sequence name |
|-------------|----------|-------------|----------|---------------|-----------------------|
| Fold change | P value  | Fold change | P value  |               |                       |
| -7.45       | 5.35E-30 | -2.16       | 6.69E-16 | NM_178165     | Fcr1                  |
| -5.95       | 0        | -2.10       | 1.02E-30 | NM_021897     | Trp53inp1             |
| -5.64       | 2.42E-32 | -1.57       | 5.51E-12 | NM_008043     | Frat1                 |
| -4.83       | 0        | -3.27       | 5.55E-39 | NM_021451     | Pmaip1                |
| -4.69       | 1.50E-27 | -1.80       | 1.16E-20 | NM_175398     | 6530418L21Rik         |
| -4.57       | 0        | -1.89       | 2.86E-22 | NM_015763     | Lpin1                 |
| -3.96       | 0        | -1.68       | 1.01E-18 | NM_177733     | E2f2                  |
| -3.74       | 4.28E-12 | -1.88       | 1.84E-06 | NM_010559     | Il6ra                 |
| -3.74       | 3.08E-40 | -1.62       | 2.54E-06 | NM_008873     | Plau                  |
| -3.62       | 1.11E-36 | -1.70       | 3.24E-06 | NM_013753     | X99384                |
| -3.32       | 2.16E-13 | -1.60       | 1.41E-06 | NM_001012450  | Ankrd6                |
| -3.08       | 2.97E-12 | -1.74       | 3.82E-08 | NM_007520     | Bach1                 |
| -3.05       | 0        | -1.54       | 1.92E-14 | NM_028808     | P2ry13                |
| -2.94       | 1.52E-13 | -1.90       | 1.39E-12 | NM_133218     | Zfp704                |
| -2.83       | 6.42E-14 | -1.52       | 1.09E-06 | NM_019464     | Sh3glb1               |
| -2.79       | 2.13E-42 | -1.65       | 2.16E-10 | NM_024191     | Arl2bp                |
| -2.76       | 0        | -1.86       | 7.21E-13 | NM_008245     | Hhex                  |
| -2.44       | 0        | -1.89       | 1.24E-10 | NM_145928     | Tspan14               |
| -2.20       | 3.67E-36 | -2.48       | 3.20E-37 | NM_133738     | Antxr2                |
| -2.12       | 1.14E-12 | -2.18       | 4.10E-18 | NM_024173     | Atp6v1g1              |
| -2.12       | 8.66E-18 | -1.54       | 6.14E-09 | NM_172595     | Arl15                 |
| -2.09       | 1.28E-20 | -1.67       | 5.70E-07 | NM_011890     | Sgcb                  |
| -2.07       | 5.30E-14 | -1.87       | 1.47E-07 | NM_145959     | D15Ert621e            |
| -2.07       | 1.47E-07 | -1.81       | 9.15E-13 | NM_029019     | Stard6                |
| -2.00       | 3.94E-12 | -2.03       | 1.55E-12 | NM_008541     | Smad5                 |
| -1.97       | 4.75E-07 | -2.15       | 1.64E-06 | NM_178592     | Bat5                  |
| -1.91       | 1.15E-09 | -1.72       | 5.01E-07 | NM_134002     | Csnk1g2               |
| -1.85       | 2.40E-13 | -1.73       | 2.75E-21 | NM_175127     | Fbxo28                |
| -1.84       | 2.78E-19 | -1.63       | 1.46E-06 | NM_172742     | BB128963              |
| -1.82       | 1.22E-24 | -1.65       | 3.58E-18 | NM_138667     | Map3k7ip2             |
| -1.80       | 1.79E-17 | -1.86       | 8.32E-09 | NM_007929     | Emp2                  |
| -1.60       | 3.92E-06 | -1.72       | 1.14E-07 | NM_146032     | Srp68                 |
| -1.55       | 8.88E-12 | -1.51       | 2.63E-10 | NM_145958     | Kbtbd2                |
| -1.55       | 1.64E-15 | -1.58       | 4.41E-09 | NM_199307     | Ece1                  |
| -1.54       | 3.15E-07 | -1.87       | 2.96E-07 | NM_173432     | Pskh1                 |

Data presented here show the overlap of down-regulated hits of array 1 and array 2 that are predicted by TargetScan5.1 possessing a 7-mer or 8-mer seed of mmu-miR-155.

**Table S2. Primer sequences**

| Primer name                                         | 5'–3' forward                   | 5'–3' reverse                          |
|-----------------------------------------------------|---------------------------------|----------------------------------------|
| Primers for quantitative RT-PCR (SYBR-green method) |                                 |                                        |
| β-Actin                                             | CGTGAAAAGATGACCCAGATCA          | CACAGCCTGGATGGCTACGT                   |
| IL-6                                                | ACAAGTCGGAGGCTTAATTACACAT       | TTGCCATTGCACAACCTTTTC                  |
| Pmaip1/Noxa                                         | CCGCCGTTGATGGAA                 | AGCGTTTCTCTCATCACATCACA                |
| Bach1                                               | CCGCAGCATCCATTTCAAC             | TCCGCATAGGAAGGGCTCTT                   |
| Lpin1                                               | GAGCATGCCAAGACCAACATC           | CAATGGGAAGACGTGATCGA                   |
| Tspan14                                             | GGCGAGGACCCTGATCTCA             | TGCTGCATCTGCTTCTCAGAA                  |
| Primers for cloning                                 |                                 |                                        |
| Lpin1 3' UTR                                        | CCGCTCGAGCGCGACCGAGCATTAAAGG    | ATAAGAATGCGCCGCGGCTGCAGAGGGCATTG       |
| Pmaip1 3' UTR                                       | CCGCTCGAGGTTCTTCCAAAGCTTTTGCAAG | ATAAGAATGCGCCGCGCATTTTTCAATAGTTAC      |
| Tspan14-1 3' UTR                                    | CCGCTCGAGGAAGCAGATGCAGCAAATG    | ATAAGAATGCGCCGCGCATGCTCGGAGTATCCAG     |
| Tspan14-2 3' UTR                                    | CCGCTCGAGGAAGCAGATGCAGCAAATG    | ATAAGAATGCGCCGCGCTTAATGCTTTTTGTTTAATAG |
| Primers for mutagenesis                             |                                 |                                        |
| Lpin1 mut1 3' UTR                                   | GAGCGCGACCGAGCAAATAAGGATAG      | CCCCACAACCTATCCTTATTGCTC               |
| Lpin1 mut1/mut2 3' UTR                              | GCCGTCATGAATGCAAATAAAG          | CACACTTAACCTTATTGCTTAC                 |
| Pmaip1 mut1 3' UTR                                  | GTGTGTTATTGTAAGCAAATACTGG       | CTTTATACTCTCCAGTATTGCTTAC              |
| Pmaip1 mut1/mut2 3' UTR                             | GCTAGTGGGCTCAGCAAATAGG          | GTAACAACCTATTGCTGAGG                   |
| Tspan14-1 mut1 3' UTR                               | CTCGTTTCTCATAGCAAATAGCCC        | CCCTCAGTAGGGCTATTGCTATG                |
